# Supplementary material
Source: PubMed Central journal article supplement (PMC6829056)
Supplement: NIHMS1530963-supplement-1.pdf [file NIHMS1530963-supplement-1.pdf]

**eTable 1. ICD-10 codes used to define maternal drug-related deaths.**

| ICD-10 code                                           | Diagnosis                                                                                                                                                                                                                            |
|-------------------------------------------------------|--------------------------------------------------------------------------------------------------------------------------------------------------------------------------------------------------------------------------------------|
| Accidental poisoning                                  | X40-X44                                                                                                                                                                                                                              |
| Poisoning of undetermined intent by exposure to drugs | Y10-Y14                                                                                                                                                                                                                              |
| Drug-induced diseases                                 | D52.1, D59.0, D59.2, D61.1, D64.2, E06.4, E16.0, E23.1, E24.2, E27.3, E66.1, G21.1, G24.0, G25.1, G25.4, G25.6, G44.4, G62.0, G72.0, I95.2, J70.2-J70.4, K85.3, L10.5, L27.0, L27.1, M10.2, M32.0, M80.4, M81.4, M83.5, M87.1, R50.2 |
| Drugs in the blood                                    | R78.1-R78.5                                                                                                                                                                                                                          |
| Mental/behavioral disorders due to drugs              | F11.0-F11.5, F11.7-F11.9, F12.0-F12.5, F12.7-F12.9, F13.0-F13.5, F13.7-F13.9, F14.0-F14.5, F14.7-F14.9, F15.0-F15.5, F15.7-F15.9, F16.0-F16.5, F16.7-F16.9, F18.0-F18.5, F18.7-F18.9, F19.0-F19.5, F19.7-F19.9                       |

**eTable 2. Sociodemographic characteristics of delivery hospitalizations excluded from analytic sample, California, 2010-2012.**

| Sociodemographic characteristic | N (%)           |
|---------------------------------|-----------------|
| Age in years                    |                 |
| <20 years                       | 33,056 (8.2%)   |
| 20-35 years                     | 317,199 (78.9%) |
| ≥35 years                       | 51,995 (12.9%)  |
| Race/ethnicity                  |                 |
| White, non-Hispanic             | 56,437 (14.0%)  |
| Black, non-Hispanic             | 10,832 (2.7%)   |
| Hispanic                        | 280,223 (69.7%) |
| Asian/Pacific Islander          | 39,113 (9.7%)   |
| Other                           | 15,645 (3.9%)   |
| Insurance/payer                 |                 |
| Private                         | 96,378 (24.0%)  |
| Medicaid                        | 281,063 (69.9%) |
| Self-pay                        | 20,021 (5.0%)   |
| Other                           | 4,788 (1.2%)    |
